# Supplementary material for: Transparency and AIE tunable supramolecular polymer hydrogel acts as TEA–HCl vapor controlled smart optical material
Source: Royal Society of Chemistry journal article supplement (doi:10.1039/d0sm00522c), 2020-01-01
Supplement: d0sm00522c1.pdf [file d0sm00522c1.pdf]

## **Electronic Supplementary Information**

### **Transparency and AIE tunable supramolecular polymer hydrogel act as TEA-HCl vapor controlled smart optical material**

Xiao-Wen Sun, Zhong-Hui Wang, Ying-Jie Li, Hai-Long Yang, Guan-Fei Gong, You-Ming Zhang, Hong Yao, Tai-Bao Wei and Qi Lin\*

Key Laboratory of Eco-functional Polymer Materials of the Ministry of Education, Key Laboratory of Eco-environmental Polymer Materials of Gansu Province, College of Chemistry and Chemical Engineering Northwest Normal University, Lanzhou, 730070, China.

E-mail: [linqi2004@126.com](mailto:linqi2004@126.com)

## Table of Contents

|                                                                                |    |
|--------------------------------------------------------------------------------|----|
| Materials and General.....                                                     | S2 |
| Methods.....                                                                   | S2 |
| Synthesis.....                                                                 | S2 |
| Scheme S1. Synthesis route of TA.....                                          | S2 |
| Figure S1. $^1\text{H}$ NMR spectrum of TA.....                                | S3 |
| Figure S2. Mass spectrum of TA.....                                            | S3 |
| Figure S3. $^1\text{H}$ NMR spectrum of A.....                                 | S4 |
| Figure S4. Mass spectrum of A.....                                             | S5 |
| Figure S5. $^1\text{H}$ NMR spectrum of AN.....                                | S6 |
| Figure S6. Mass spectrum of AN.....                                            | S6 |
| Figure S7. $^1\text{H}$ NMR spectrum of TH.....                                | S7 |
| Figure S8. $^{13}\text{C}$ NMR spectrum of TH.....                             | S7 |
| Figure S9. Mass spectrum of TH.....                                            | S8 |
| Table S1. Gelation Properties of TH-G in different gelation concentration..... | S8 |
| Figure S10. FT-IR spectra of TH and TH-G.....                                  | S9 |

### Materials and General Methods:

**Materials:** All chemical reagents are high purity commercial reagents. Triethylamine (TEA) and hydrochloric acid (12 mol/L) were analytical grade. The water was fresh double-distilled water throughout the experiment. To record the  $^1\text{H}$  NMR and  $^{13}\text{C}$  NMR spectra, we were used Varian Mercury 400 and Varian Inova 600 instruments. To record MS, we were used a Bruker Esquire 3000 high-resolution MS instrument. To use a scanning electron microscopy (SEM) system (JEOL, Model JSM-6701F) characterized the surface morphologies of **TH-GF**. The infrared spectra were characterized on Digilab FTS-3000 FT-IR spectrophotometer. Melting point was measured by using X-4 digital melting-point apparatus. The fluorescence spectra were recorded by Shimadzu RF-5301PC fluorescence spectrophotometer. Ultraviolet-visible (UV-vis) spectra were recorded on a Shimadzu UV-2550 spectrometer.

### Synthesis:

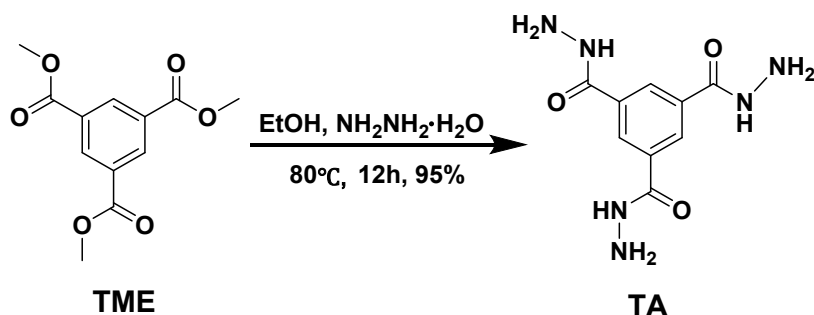

**Scheme S1.** Synthesis route of TA

### Synthesis of TA:

Hydrazine hydrate (5ml, 85%) was dropwise added into a solution of the TME (0.5040 g, 2 mmol) in alcohol (30 mL). The mixture was stirred and refluxed at 80 °C for 24 h. The product was filtered and washed twice by water. Finally, the white solid was obtained (compound TA) (0.4808 g, yield: 95%). ESI-MS  $m/z$ :  $[\text{M}+\text{H}]^+$  Calcd  $\text{C}_9\text{H}_{12}\text{N}_6\text{O}_3$ : 253.1044, found 253.1037.

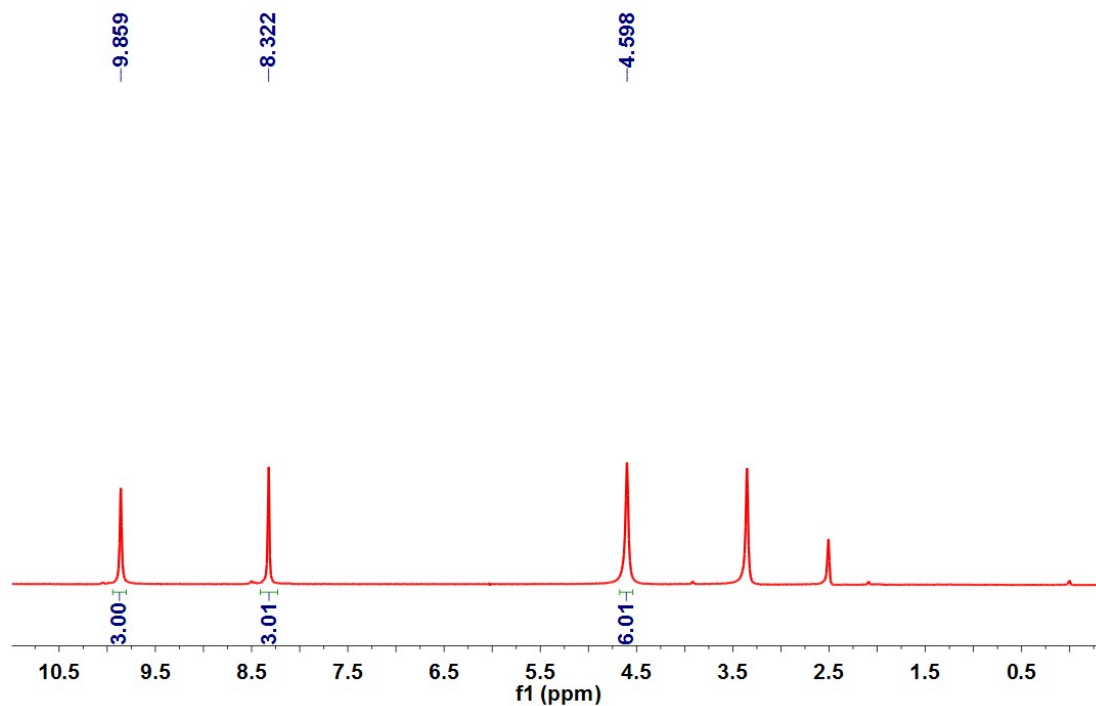

**Figure S1.**  $^1\text{H}$  NMR spectrum of TA

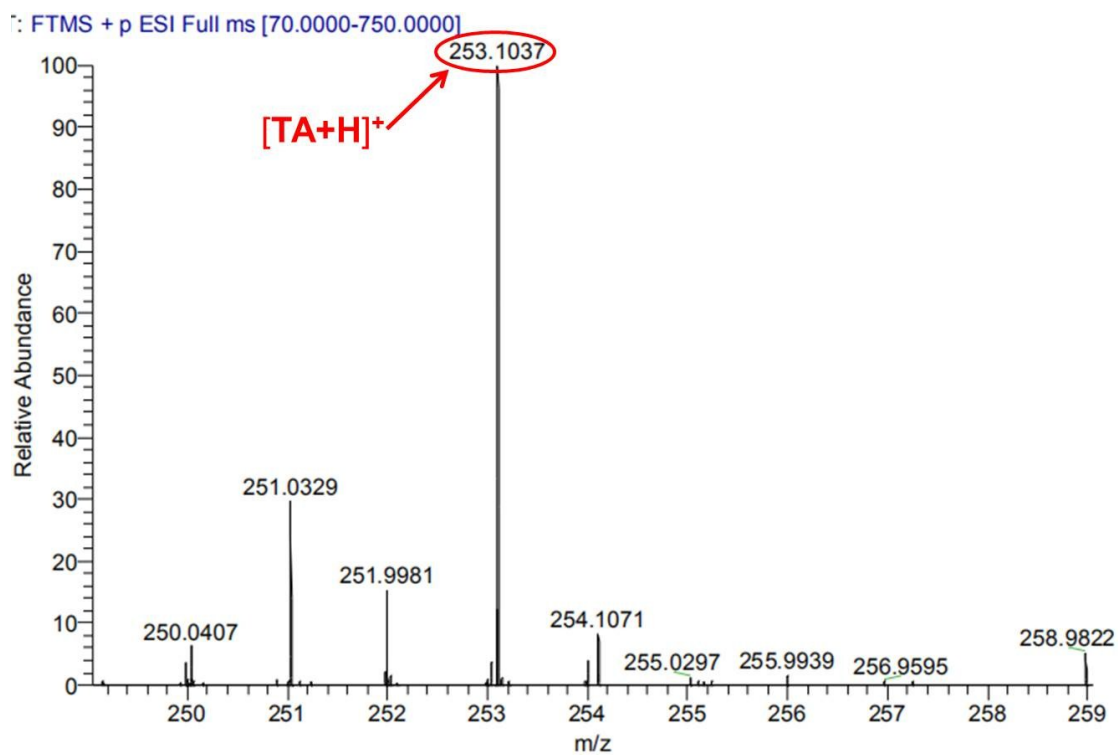

**Figure S2.** Mass spectrum of TA

#### Synthesis of A:

A mixture of P-hydroxybenzaldehyde (1.22 g, 10mmol), 1, 6-dibromohexane (9.68 g, 40mmol), KI (0.83 g, 5mmol) and  $\text{K}_2\text{CO}_3$  (1.38 g, 10mmol) was added into acetone

(150 mL). The mixture was heated under nitrogen atmosphere at reflux at 60°C for 72 h. The reaction mixture was concentrated by rotary evaporation, the crude product isolated by flashed column chromatography using petroleum ether/ethyl acetate (20:1). Finally, the white solid was obtained (compound **A**) (2.00 g, yield: 70.4%). The melting point is 49-52 °C.  $^1\text{H}$  NMR (DMSO- $d_6$ , 600 MHz)  $\delta$ /ppm: 9.88 (s, 1H), 7.84-7.82 (m, 2H), 6.00-6.98 (m, 2H), 4.06-4.04 (m, 2H), 3.44-3.42 (t,  $J = 6.7\text{Hz}$ , 1H), 3.22-3.20 (t,  $J = 6.9\text{Hz}$ , 1H), 1.92-1.82 (m, 4H), 1.53-1.50 (m, 4H). ESI-MS  $m/z$ :  $[\text{M}+\text{H}]^+$  Calcd  $\text{C}_{13}\text{H}_{17}\text{O}_2\text{Br}$ : 258.0485, found 258.0485.

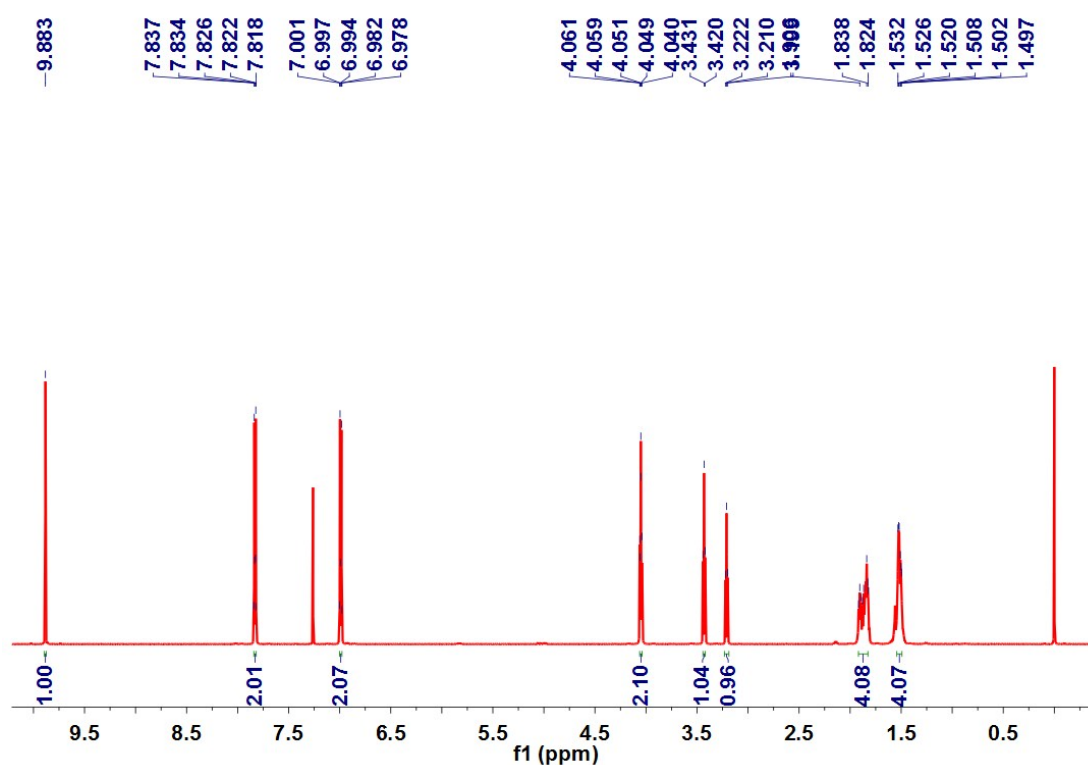

Figure S3.  $^1\text{H}$  NMR spectrum of **A**

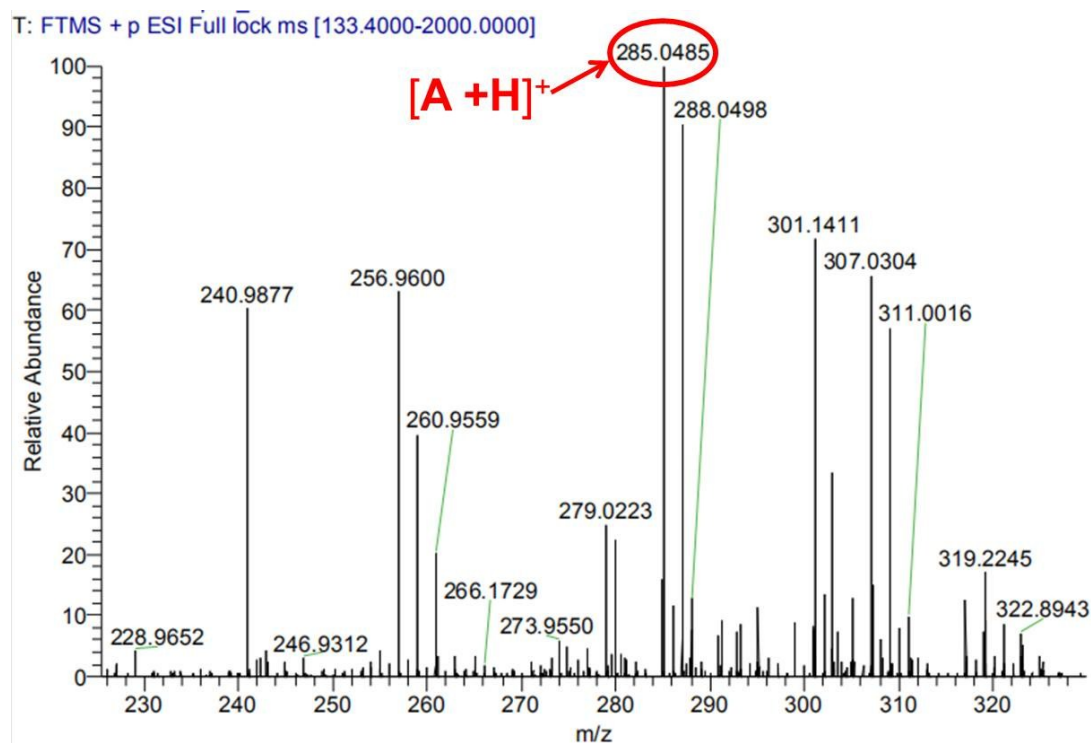

**Figure S4.** Mass spectrum of **A**

#### Synthesis of AN:

Compound **A** (0.142 g, 0.5 mmol) was added into ethyl acetate (2ml) and stirring at room temperature for 5 minute. Then, trimethylamine (33 % in ethanol, 1.0 mL, 3.7 mmol) was added into the solution of the compound **A**, and stirring at room temperature for 48 hours. Then the solvent was removed by evaporation, the crude product was washed by diethyl ether to obtain a white solid (compound **AN**) (0.13 g, yield: 76%). The melting point is 89-91 °C.  $^1\text{H}$  NMR (DMSO- $d_6$ , 600 MHz),  $\delta$ /ppm: 9.86 (s, 1H), 7.82-7.80 (m, 2H), 6.98-9.97 (m, 2H), 4.04-4.02 (t,  $J = 6.2\text{Hz}$ , 2H), 3.66-3.63 (m, 2H), 3.45 (s, 10H), 1.83-1.80 (m, 4H), 1.59-1.54 (m, 2H), 1.50-1.45 (m, 2H). ESI-MS m/z:  $[M+K]^+$  Calcd  $\text{C}_{16}\text{H}_{26}\text{BrNO}_2$ : 382.0799, found 382.0793.

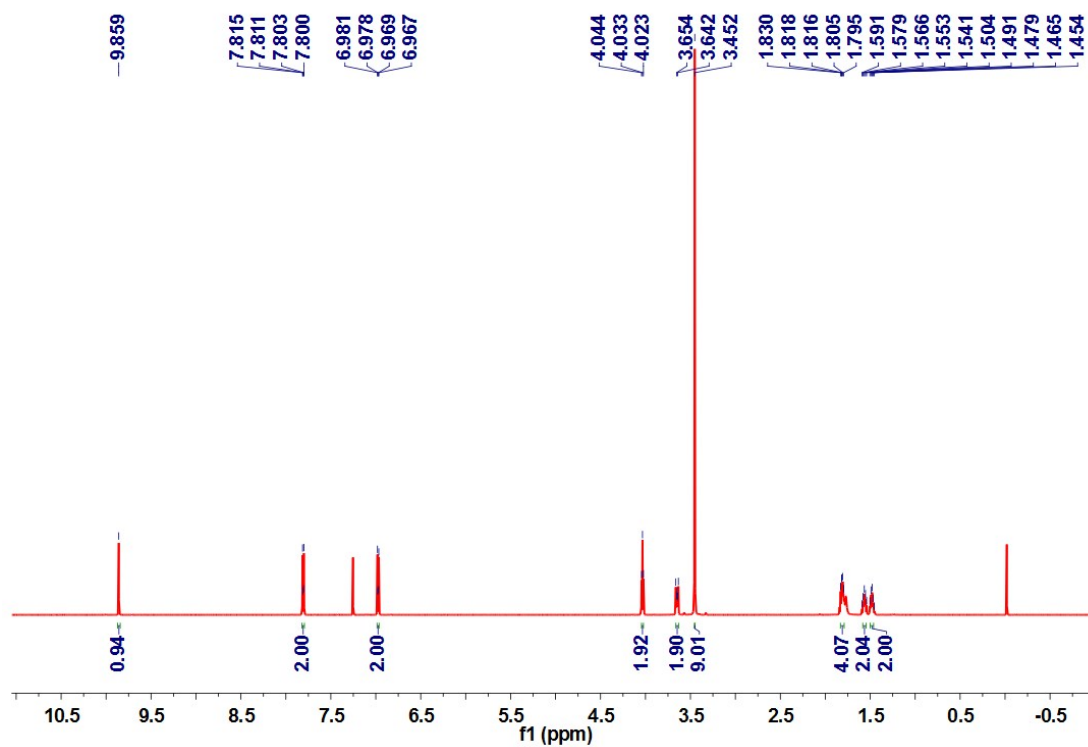

Figure S5. <sup>1</sup>H NMR spectrum of AN

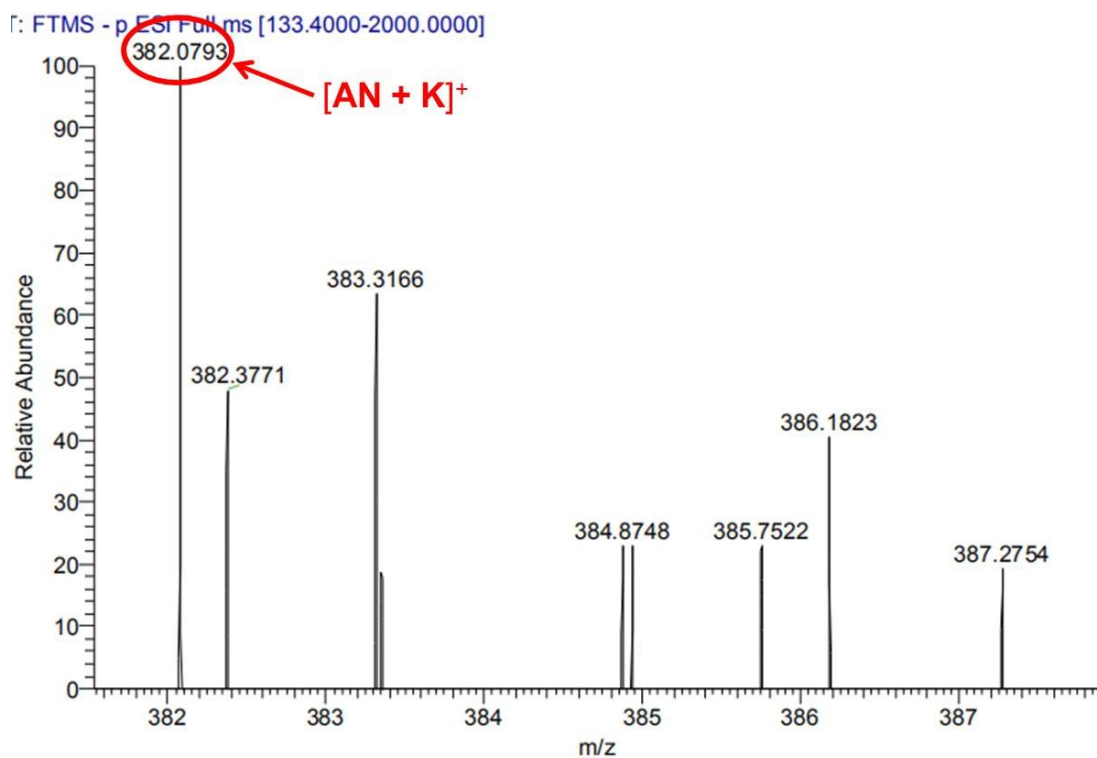

Figure S6. Mass spectrum of AN

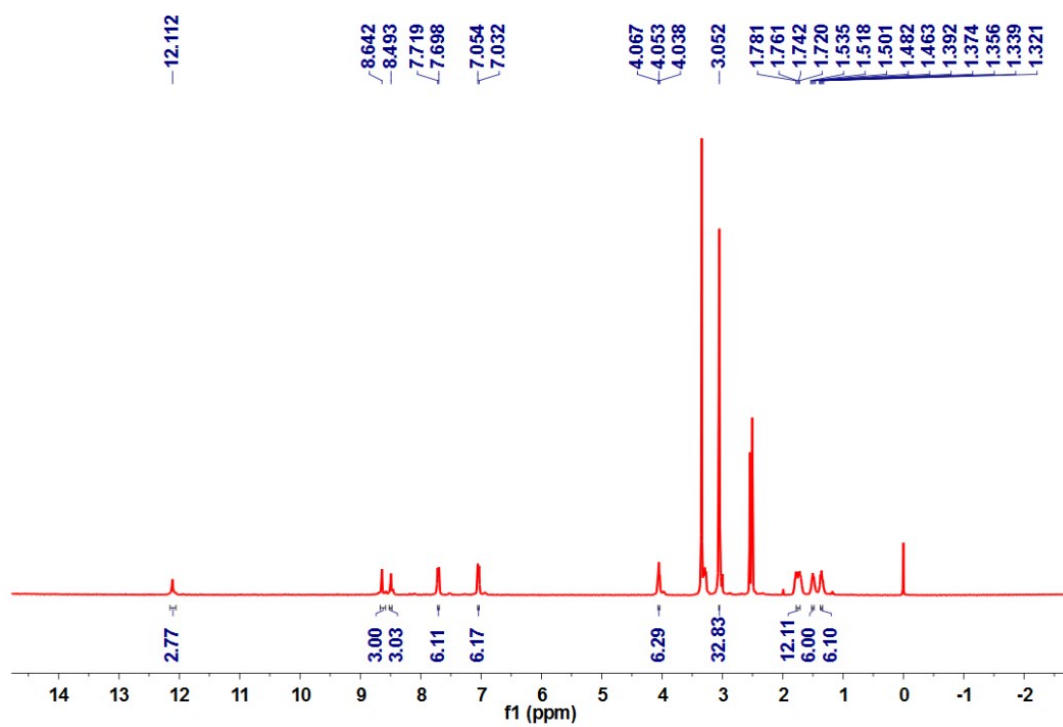

Figure S7. <sup>1</sup>H NMR spectrum of TH

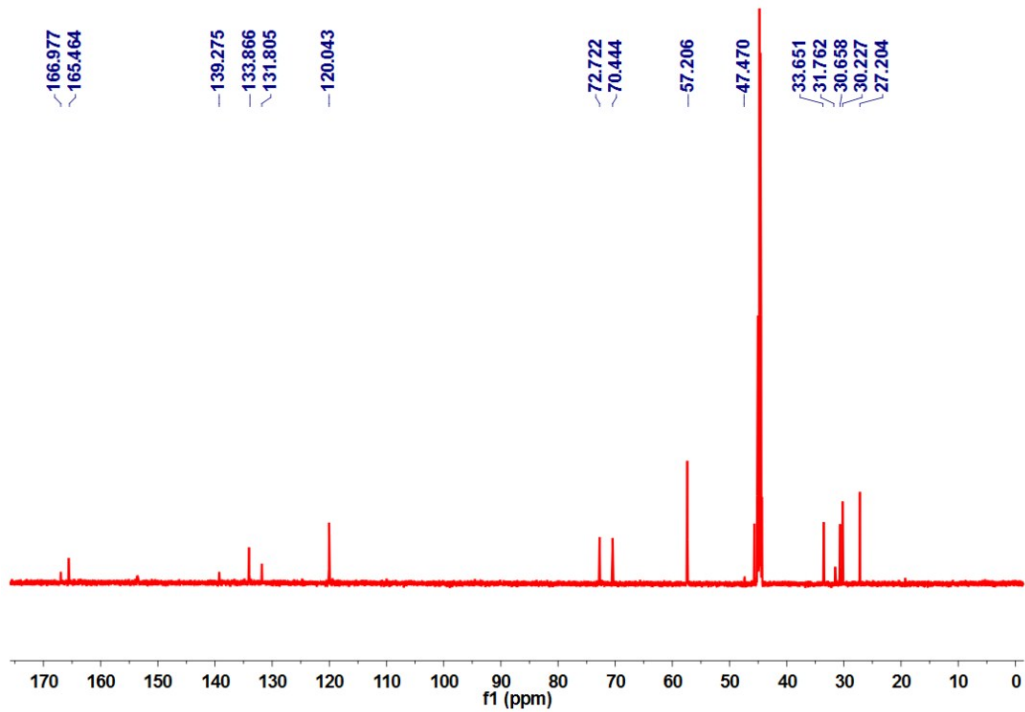

Figure S8. <sup>13</sup>C NMR spectrum of TH

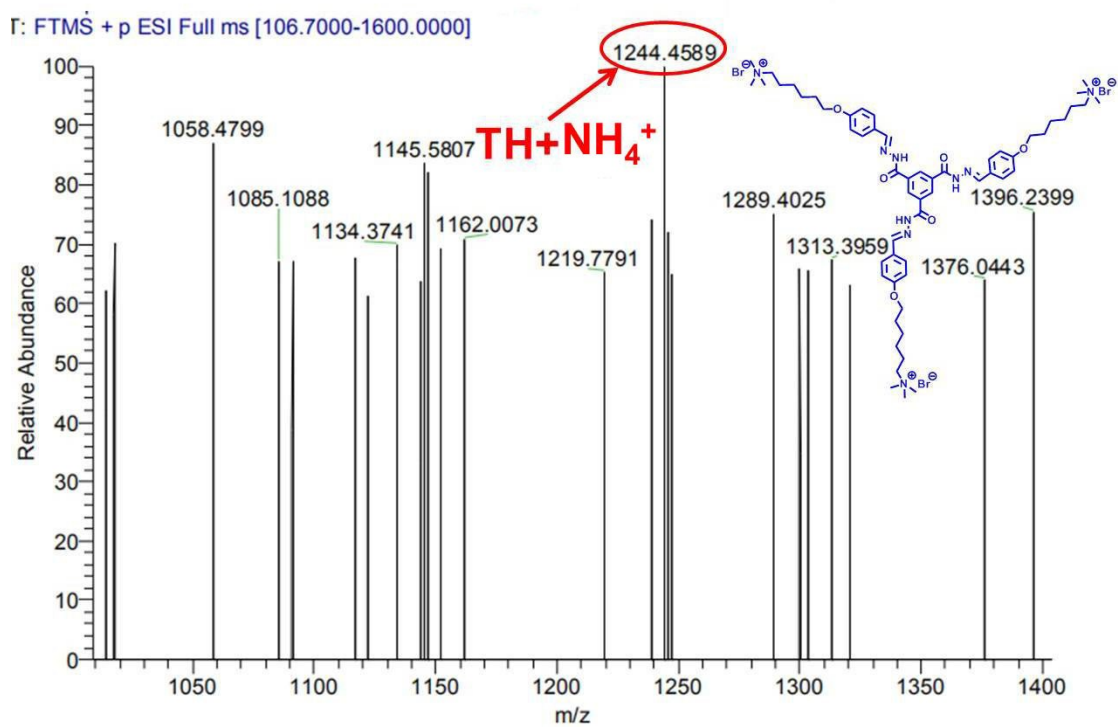

**Figure S9.** Mass spectrum of TH

**Table S1.** Gelation Properties of TH-G in different gelation concentration

| Entry | CGC(%) | T <sub>sol</sub> -T <sub>gel</sub> (°C) |
|-------|--------|-----------------------------------------|
| 1     | 5      | 37-35                                   |
| 2     | 10     | 44-42                                   |
| 3     | 15     | 47-43                                   |
| 4     | 20     | 44-41                                   |
| 5     | 25     | 43-40                                   |

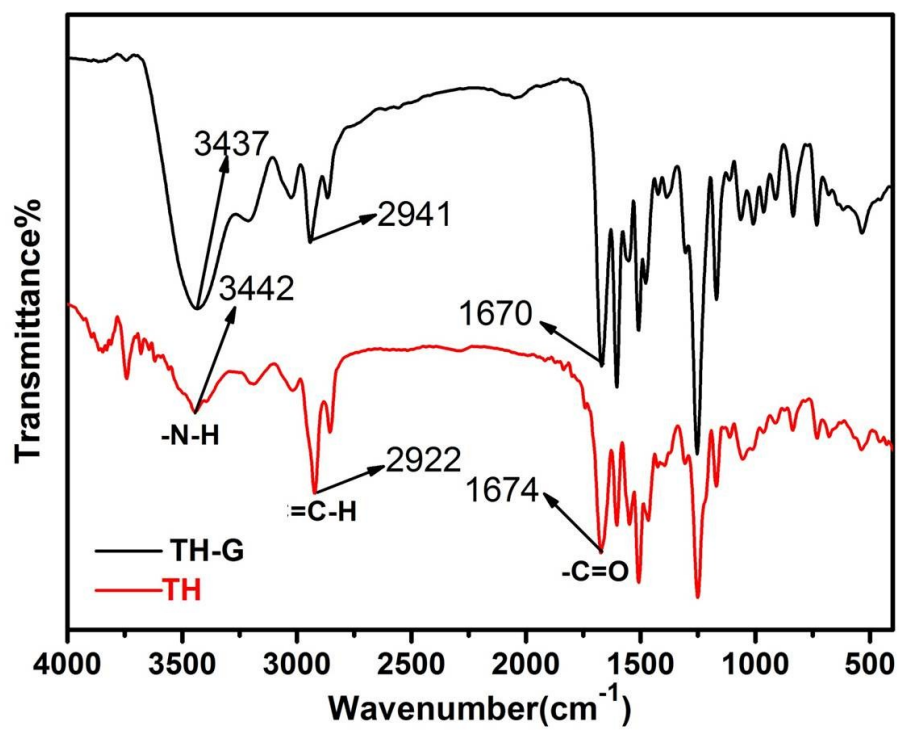

Figure S10. FT-IR spectra of TH and TH-G
